# Supplementary material for: Suitability of Polymyxin B as a Mucosal Adjuvant for Intranasal Influenza and COVID-19 Vaccines
Source: MDPI journal article supplement (doi:10.3390/vaccines11111727), 2023-11-18
Supplement: s1 [file s1]

### Supplementary Figure Captions

#### **Figure S1. Quantity of S1-specific antibodies (Abs) in mice immunized with 1 µg of S1 subunit**

Mice were subjected to either intranasal (IN) or subcutaneous (SC) immunization with 1 µg of SARS-CoV-2 S1 subunit (4–6 mice per experimental group). Mucosal secretions (TBL: tracheal-bronchial lavages; NW: nasal washes; saliva; FE: fecal extract; VW: vaginal wash) and plasma were collected. S1-specific IgA and IgG Abs in mucosal secretions (1:2) or plasma (1:100) diluted in 1% BSA-PBS were quantified using an ELISA system described in the Materials and Methods section. Each dot represents a single mouse. The horizontal dotted line indicates the detection limit. Significant differences in OVA-specific Ab titers between experimental groups are indicated by asterisks:  $**p<0.005$ .

#### **Figure S2. Quantity of S1-specific Abs in mice immunized with 10 µg of S1 subunit**

Mice were subjected to either intranasal (IN) or subcutaneous (SC) immunization with 10 µg of S1 subunit of the SARS-CoV-2 S protein (4–6 mice per experimental group). S1-specific Abs in the mucosal secretions (1:2) or plasma (1:100) diluted in 1% BSA-PBS were quantified using ELISA. Abbreviations are the same as those in the legend of Figure S1.  $**p<0.005$ .

#### **Figure S3. Quantity of S-specific Abs in mice immunized with 10 µg of S1 subunit**

Aliquots of the samples in Figure S2 were used to quantify the S-specific antibodies using ELISA. Abbreviations are the same as those in the legend of Figure S1.  $**p<0.005$ .

#### **Figure S4. Quantity of S1-specific Abs in mice immunized with 1 µg of S protein**

Mice were subjected to either intranasal (IN) or subcutaneous (SC) immunization with 1 µg of SARS-CoV-2 S protein (4–6 mice per experimental group). S1-specific Abs in mucosal secretions (1:2) or plasma (1:100) diluted in 1% BSA-PBS were quantified using ELISA. Abbreviations are the same as those in the legend of Figure S1.  $*p<0.05$ ,  $**p<0.005$ .
